# Supplementary material
Source: Copernicus journal article supplement (doi:10.5194/egusphere-2026-3255)
Supplement: Supplementary file 1 [file egusphere-2026-3255-supplement.pdf]

1 *Supporting Information for*

2 **An Overlooked Kinetic Relaxation in the Formation of Sesquiterpene-Derived**  
3 **Criegee Intermediates**

4

5 Hengjia Ou,<sup>1,†</sup> Yao Li,<sup>2,†</sup> Yuqing Sha,<sup>3</sup> Hui Zhou,<sup>4,5</sup> Jingkun Jiang,<sup>6</sup> Kunpeng Chen<sup>4,6,\*</sup>

6

7 <sup>1</sup>Guangzhou Institute of Tropical and Marine Meteorology of China Meteorological  
8 Administration, Guangzhou 510640, China

9 <sup>2</sup>Yantai Meteorological Bureau, Yantai, Shandong 264003, China

10 <sup>3</sup>Fuyang Meteorological Bureau, Fuyang, Anhui 236000, China

11 <sup>4</sup>Key Laboratory for Thermal Science and Power Engineering of Ministry of Education, Beijing  
12 Key Laboratory of CO<sub>2</sub> Utilization and Reduction Technology, Department of Energy and Power  
13 Engineering, Tsinghua University, Beijing 100084, China

14 <sup>5</sup>Shanxi Research Institute for Clean Energy, Tsinghua University, Shanxi, Taiyuan 030000, China

15 <sup>6</sup>State Key Laboratory of Regional Environment and Sustainability, School of Environment,  
16 Tsinghua University, Beijing 100084, China

17

18 Email: [chenkp@mail.tsinghua.edu.cn](mailto:chenkp@mail.tsinghua.edu.cn)

19

20 <sup>†</sup>Hengjia Ou and Yao Li contributed equally to this work.

21

22 Texts: S1 to S2

23 Tables: S1 to S4

24 Figures: S1 to S9

25

26 **Text S1.** Derivation of the formation rate constant of CIs

27 This section describes the detailed derivation for the formation rate constant of CIs. For  
28 simplicity in the derivation, we firstly consider one CI from the ozonolysis of the sesquiterpene  
29 (SQT) molecule, wherein only one SPC and one POZ connect the reaction chain (Scheme II in the  
30 manuscript). For atmospheric chemistry models, the formation rate of CIs ( $R_f$ ) is typically given  
31 by Eq. (S1).

$$32 \quad R_f = k_{CI} \cdot C_{SQT} \cdot C_{O_3} \quad (S1)$$

33 Here  $k_{CI}$  is the formation rate constant of CIs generated from the reactions between  
34 sesquiterpene (SQT) and  $O_3$ , while  $C_{SQT}$  and  $C_{O_3}$  represent the concentrations of SQT and  $O_3$ . If  
35 we change the perspective and start to think about the basic principle of elementary reactions,  $R_f$   
36 is actually determined by the rate of POZ decomposition (Scheme II in the manuscript), and its  
37 expression is given by Eq. (S2).

$$38 \quad R_f = k_3 \cdot C_{POZ} \quad (S2)$$

39 If we try to compare Eq. (S2) with Eq. (S1), we will find it necessary to express the  
40 concentration of POZ ( $C_{POZ}$ ) as a function of  $C_{SQT}$  and  $C_{O_3}$ . Based on Scheme II in the manuscript,  
41 the kinetics regarding the change of  $C_{POZ}$  along with ozonolysis time ( $t$ ) can be analytically  
42 expressed as Eq. (S3).

$$43 \quad \frac{dC_{POZ}}{dt} = k_2 \cdot C_{SPC} - (k_{-2} + k_3) \cdot C_{POZ} \quad (S3)$$

44 The quantity  $C_{SPC}$  represents the concentration of SPC and  $k_2$  is the rate constant of POZ  
45 formation from the SPC. The generated POZ can either reversely produce SPC again or decompose  
46 into the CI, with the rate constants represented by  $k_{-2}$  and  $k_3$ , respectively. As supported by  
47 experimental studies (Talukdar et al., 2003; Davis et al., 2005; Ou and Chen, 2025),  $C_{SPC}$  can be  
48 approximated by its steady-state concentration (Eq. (S4)).

49 
$$\frac{dC_{SPC}}{dt} = 0 \quad (S4)$$

50 Eq. (S4) means that, at any time during the SQT ozonolysis, the concentration of the SPC  
 51 is assumed to be constant. The left-hand side of Eq. (S4), based on Scheme II in the manuscript,  
 52 can be expressed as Eq. (S5).

53 
$$\frac{dC_{SPC}}{dt} = k_1 \cdot p \cdot C_{SQT} \cdot C_{O_3} - (k_{-1} + k_2) \cdot C_{SPC} \quad (S5)$$

54 Here  $k_1$  is the rate constant of effective collisions between the SQT and  $O_3$ ,  $p$  is the  
 55 branching ratio that the effective collisions can produce this SPC (as the SQT and  $O_3$  indeed yield  
 56 multiple SPCs),  $k_{-1}$  is the dissociation rate constant of the SPC,  $k_2$  is the formation rate constant  
 57 of the POZ from the SPC. Combining Eqs. (S4) and (S5), the steady-state concentration of SPC,  
 58 denoted as  $C_{SPC,ss}$ , is given by Eq. (S6).

59 
$$C_{SPC,ss} = k_1 \cdot p \cdot \left( \frac{1}{k_{-1} + k_2} \right) \cdot C_{SQT} \cdot C_{O_3} \quad (S6)$$

60 Eq. (S6) suggests that, within the modeling timescale, both the concentrations of SQT and  
 61  $O_3$  are stable enough, so  $C_{SQT}$  and  $C_{O_3}$  remain constant. It is noted that  $C_{SPC,ss}$  is a function of  
 62 temperature since  $k_1$ ,  $k_{-1}$  and  $k_2$  may change during the temperature variations. Substituting Eq.  
 63 (S6) into Eq. (S3), we obtain Eq. (S7).

64 
$$\frac{dC_{POZ}}{dt} = k_1 \cdot p \cdot \left( \frac{k_2}{k_{-1} + k_2} \right) \cdot C_{SQT} \cdot C_{O_3} - (k_{-2} + k_3) \cdot C_{POZ} \quad (S7)$$

65 For convenience, if we denote  $C_{POZ}$  as  $y$ , the first term on the right-hand side of Eq. (S7)  
 66 as  $b$ , and  $(k_{-2} + k_3)$  in Eq. (S7) as  $a$ , the Eq. (S7) then becomes a classical ordinary differential  
 67 equation as shown in Eq. (S8).

68 
$$\frac{dy}{dt} = b - ay \quad (S8)$$

69 After rearranging the Eq. (S8), we can conduct the indefinite integral as Eq. (S9), and then  
 70 obtain the expression of  $y$  as a function of  $t$  with a constant  $c'$  for integration (Eq. (S10)).

$$71 \quad \frac{1}{a} \cdot \int \frac{d(ay)}{b-ay} = \int dt \quad (S9)$$

$$72 \quad y = \frac{b}{a} \cdot (1 - c'e^{-at}) \quad (S10)$$

73 Notably, in the experimental measurements of CI formation from ozonolysis, there is  
 74 typically no pre-existing POZ (i.e.,  $y = 0$ ) when the ozonolysis starts (i.e.,  $t = 0$ ). In this case, we  
 75 can obtain the value of  $c'$  by solving Eq. (S10), which provides  $c' = 1$ .

76 By transforming  $a$  and  $b$  back to their original symbols, the analytical expression of  $C_{POZ}$   
 77 is given by Eq. (S11).

$$78 \quad C_{POZ} = k_1 \cdot p \cdot \left(\frac{1}{k_{-2}+k_3}\right) \cdot \left(\frac{k_2}{k_{-1}+k_2}\right) \cdot [1 - e^{-(k_{-2}+k_3)t}] \quad (S11)$$

79 Substituting Eq. (S11) into Eq. (S2), the analytical expression of  $R_f$  is given by Eq. (S12).

$$80 \quad R_f = k_1 \cdot p \cdot \left(\frac{k_3}{k_{-2}+k_3}\right) \cdot \left(\frac{k_2}{k_{-1}+k_2}\right) \cdot [1 - e^{-(k_{-2}+k_3)t}] \cdot C_{SQT} \cdot C_{O_3} \quad (S12)$$

81 Now we obtain the formation rate of a single CI as a function of all the related rate constants  
 82 of elemental reactions as well as the concentrations of SQT and  $O_3$ . Considering all the SPCs and  
 83 their corresponding POZs generated from the ozonolysis and all the CIs generated from POZ  
 84 decomposition, Eq. (S12) can be rewritten into a comprehensive expression given by Eq. (S13).

$$85 \quad R_f = k_1 \cdot \sum_i \sum_j \left\{ p_i \cdot \left(\frac{k_{3,i,j}}{k_{-2,i}+k_{3,i,j}}\right) \cdot \left(\frac{k_{1,i} \cdot k_{2,i}}{k_{-1,i}+k_{2,i}}\right) \cdot [1 - e^{-(k_{-2,i}+k_{3,i,j})t}] \right\} \cdot C_{SQT} \cdot C_{O_3} \quad (S13)$$

86 The subscript  $i$  in Eq. (S13) indicates the  $i$ -th SPC and the  $i$ -th POZ, and the subscript  $j$   
 87 indicates the  $j$ -th CI from the  $i$ -th POZ decomposition. Both  $i$  and  $j$  are positive integers. The value  
 88 of  $i$  ranges from 1 to the total number of CIs, while the value of  $j$  is either 1 or 2, since each POZ  
 89 can decompose into two possible CIs. Comparing Eq. (S13) with Eq. (S1), we can directly obtain  
 90 the expression of  $k_{CI}$ , which shows the rate constant of total CI formation (Eq. (S14)).

$$91 \quad k_{CI} = k_1 \cdot \sum_i \sum_j \left\{ p_i \cdot \left(\frac{k_{3,i,j}}{k_{-2,i}+k_{3,i,j}}\right) \cdot \left(\frac{k_{1,i} \cdot k_{2,i}}{k_{-1,i}+k_{2,i}}\right) \cdot [1 - e^{-(k_{-2,i}+k_{3,i,j})t}] \right\} \quad (S14)$$

92 Eq. (S14) handles all the kinetic details at the “double-well” potential energy surface of the  
 93 CI formation mechanism, and we indicate that Eq. (S14) can be simplified by two approximations.  
 94 The first approximation is that  $k_{-2}$  may vanish, as it is negligibly small compared to  $k_{3,i,j}$ . This is  
 95 because the energy barriers for the decomposition of POZs into SPCs are significantly higher than  
 96 those for the CI formation (Donahue et al., 2011; Vereecken and Francisco, 2012; Taatjes et al.,  
 97 2014). In this case,  $k_{CI}$  can be approximated by Eq. (S15).

$$\begin{aligned}
 98 \quad k_{CI} &\approx k_1 \cdot \sum_i \sum_j \left[ p_i \cdot \frac{k_{3,i,j}}{k_{3,i,j}} \cdot \left( \frac{k_{2,i}}{k_{-1,i} + k_{2,i}} \right) \cdot (1 - e^{-k_{3,i,j}t}) \right] \\
 99 \quad &= k_1 \cdot \sum_i \sum_j \left[ p_i \cdot \left( \frac{k_{2,i}}{k_{-1,i} + k_{2,i}} \right) \cdot (1 - e^{-k_{3,i,j}t}) \right] \quad (S15)
 \end{aligned}$$

100 The second approximation is that the decomposition of each POZ produces only one major  
 101 CI. Although there should be two CIs generated from the one POZ, one of the CIs has a faster  
 102 formation rate, wherein its  $k_3$  is typically  $\sim 1-10$  orders of magnitude higher than that of the other  
 103 (Fig. 3). In this case, the summation based on  $j$  vanishes so that  $k_{CI}$  can be further approximated  
 104 by Eq. (S16).

$$105 \quad k_{CI} \approx k_1 \cdot \sum_i \left[ p_i \cdot \left( \frac{k_{2,i}}{k_{-1,i} + k_{2,i}} \right) \cdot (1 - e^{-k_{3,i}t}) \right] \quad (S16)$$

106 The expression of  $k_{CI}$  in Eq. (S16) is very similar to the expression of  $k_{oz}$  (Eq. (1) in the  
 107 manuscript). Their relationship can be clearly illustrated if we denote the branching ratio of the  $i$ -  
 108 th ozonolysis channel (i.e., the reaction pathway that generates the  $i$ -th CI through the  $i$ -th SPC  
 109 and the  $i$ -th POZ) as  $r_i$ , which is given by Eq. (S17).

$$110 \quad r_i = p_i \cdot \left( \frac{k_{2,i}}{k_{-1,i} + k_{2,i}} \right) / \sum_i \left[ p_i \cdot \left( \frac{k_{2,i}}{k_{-1,i} + k_{2,i}} \right) \right] \quad (S17)$$

111 Eq. (S17) reveals that  $\sum_i r_i = 1$ . Substituting Eq. (S17) into Eq. (S16), the relationship  
 112 between  $k_{CI}$  and  $k_{oz}$  can be derived as Eq. (S18).

$$\begin{aligned}
113 \quad k_{CI} &\approx k_1 \cdot \sum_i \left\{ r_i \cdot \sum_i \left[ p_i \cdot \left( \frac{k_{2,i}}{k_{-1,i} + k_{2,i}} \right) \right] \cdot (1 - e^{-k_{3,i}t}) \right\} \\
114 \quad &= k_1 \cdot \sum_i \left[ p_i \cdot \left( \frac{k_{2,i}}{k_{-1,i} + k_{2,i}} \right) \right] \cdot \sum_i [r_i \cdot (1 - e^{-k_{3,i}t})] \\
115 \quad &= k_{oz} \cdot \sum_i [r_i \cdot (1 - e^{-k_{3,i}t})] \tag{S18}
\end{aligned}$$

116 Eq. (S18) provides a clear physical sense that, for the  $i$ -th CI, its formation rate constant  
117 can be estimated by the product of the ozonolysis rate constant and the time-dependent branching  
118 ratio projecting of this CI ( $f_{CI,i}$ ), which is given by Eq. (S19).

$$119 \quad f_{CI,i} = r_i \cdot (1 - e^{-k_{3,i}t}) \tag{S19}$$

120 Thus, the relationship between  $k_{CI}$  and  $k_{oz}$  can be written as Eq. (S20).

$$121 \quad k_{CI} \approx k_{oz} \cdot \sum_i f_{CI,i} \tag{S20}$$

122 The time dependence of  $f_{CI,i}$  shows the kinetic relaxation of  $k_{CI}$ . Eqs. (S19) and (S20) reveal  
123 that, when the ozonolysis begins (i.e.,  $t = 0$ ), the value of  $f_{CI,i}$  is zero, which means that if the  $i$ -th  
124 POZ does not pre-exist, the initial formation rate constant of the  $i$ -th CI is zero, even though the  
125 ozonolysis rate constant of the SQT is the positive number  $k_{oz}$ . It is also noted that the value of  $f_{CI,i}$   
126 will unlimitedly approach  $r_i$  if the  $t$  is infinitely large (Eq. (S21)).

$$\begin{aligned}
127 \quad \lim_{t \rightarrow \infty} k_{CI}(t, T) &\approx \lim_{t \rightarrow \infty} [k_{oz}(T) \cdot \sum_i f_{CI,i}(t, T)] \\
128 \quad &= k_{oz}(T) \cdot \lim_{t \rightarrow \infty} \sum_i f_{CI,i}(t, T) \\
129 \quad &= k_{oz}(T) \cdot \lim_{t \rightarrow \infty} \sum_i [r_i \cdot (1 - e^{-k_{3,i}t})] \\
130 \quad &= k_{oz}(T) \cdot \sum_i r_i \\
131 \quad &= k_{oz}(T) \tag{S21}
\end{aligned}$$

132 Eq. (S21) indicates that  $k_{oz}$  represents the plateau value of  $k_{CI}$  if ozonolysis could proceed  
133 indefinitely. In the real atmosphere,  $k_{CI}$  is always in a state of deviation from  $k_{oz}$ , though it  
134 continuously tends toward this value.

135 **Text S2.** Formation rate constant of CIs with scale factors accounting for the pre-existing POZs

136 This section derives the analytical expression of  $k_{CI}$  if POZs pre-exist before the SQT  
137 ozonolysis starts. For convenience, we still start by considering only one CI produced from its  
138 corresponding POZ. The analytical expression of  $k_{CI}$  in Text S1 is derived based on the absence of  
139 pre-existing POZs, so that in Eq. (S10) the value of  $c'$  equals 1. If the initial concentration of this  
140 POZ is not zero, we may denote the value of its initial concentration as  $y_0$  ( $y_0 > 0$ ), and the value  
141 of  $c'$  can be obtained by solving Eq. (S10), which gives  $c' = 1 - (y_0 \cdot a / b)$ .

142 In the meantime, we also notice that, when  $t$  is infinitely large, the concentration of POZ  
143 unlimitedly approaches a constant, which is denoted as  $y_\infty$  in Eq. (S22).

$$144 \quad y_\infty = \lim_{t \rightarrow \infty} \left[ \frac{b}{a} \cdot (1 - c' e^{-at}) \right] = \frac{b}{a} \quad (S22)$$

145 We find it more convenient to express  $c'$  as  $c' = 1 - (y_0 / y_\infty)$ , so Eq. (S10) transforms into  
146 a general expression of  $y$ , as shown in Eq. (S23).

$$147 \quad y = y_\infty \cdot \left[ 1 - \left( 1 - \frac{y_0}{y_\infty} \right) \cdot e^{-at} \right] \quad (S23)$$

148 In this case, if we define the scale factor ( $s$ ) as the ratio of the initial POZ concentration to  
149 its ultimate value at an infinite  $t$  (i.e.,  $s = y_0 / y_\infty$  and  $s > 0$ ), and transform  $y_\infty$ ,  $a$  and  $b$  back to their  
150 original symbols, the analytical expression of  $C_{POZ}$  incorporating the scale factor will be given by  
151 Eq. (S24).

$$152 \quad C_{POZ} = k_1 \cdot p \cdot \left( \frac{1}{k_{-2} + k_3} \right) \cdot \left( \frac{k_2}{k_{-1} + k_2} \right) \cdot \left[ 1 - (1 - s) \cdot e^{-(k_{-2} + k_3)t} \right] \quad (S24)$$

153 Considering the formation of all the POZs and their CIs, along with the approximations  
154 discussed in Text S1, we further obtain the analytical expression of  $k_{CI}$  that accounts for the pre-  
155 existing POZs, as given by Eq. (S25).

$$156 \quad k_{CI} \approx k_{oz} \cdot \sum_i \{ r_i \cdot [1 - (1 - s_i) \cdot e^{-k_{3,i}t}] \} \quad (S25)$$

157 Thus, the analytical expression of  $f_{CI,i}$  becomes Eq. (S26).

158 
$$f_{CI,i} = r_i \cdot [1 - (1 - s_i) \cdot e^{-k_{3,i}t}] \quad (S26)$$

159 Eqs. (S25) and (S26) show that, when the ozonolysis begins (i.e.,  $t = 0$ ), the value of  $f_{CI,i}$  is  
 160 no longer zero but  $r_i \cdot s_i$ . Such a difference reveals that, if the  $i$ -th POZ pre-exists, the initial  
 161 formation rate constant of the  $i$ -th CI is not yet zero. As  $s_i$  in Eq. (S26) is not considered as a time-  
 162 independent quantity in this kinetic study, the value of  $k_{CI}$  with pre-existing POZs will unlimitedly  
 163 approach  $k_{oz}$  if the  $t$  is infinitely large (Eq. (S27)).

164 
$$\begin{aligned} \lim_{t \rightarrow \infty} k_{CI}(t, T) &\approx \lim_{t \rightarrow \infty} [k_{oz}(T) \cdot \sum_i f_{CI,i}(t, T)] \\ 165 &= k_{oz}(T) \cdot \lim_{t \rightarrow \infty} \sum_i f_{CI,i}(t, T) \\ 166 &= k_{oz}(T) \cdot \lim_{t \rightarrow \infty} \sum_i \{r_i \cdot [1 - (1 - s_i) \cdot e^{-k_{3,i}t}]\} \\ 167 &= k_{oz}(T) \cdot \sum_i r_i \\ 168 &= k_{oz}(T) \end{aligned} \quad (S27)$$

169 Eqs. (S26) and (S27) indicate that, although pre-existing POZs may help reduce the gap  
 170 between  $k_{CI}$  and  $k_{oz}$ ,  $k_{CI}$  is still deviated from  $k_{oz}$ . We should be cautious about using  $k_{oz}$  to represent  
 171  $k_{CI}$  in the modeling of CI formation.

172

173 **Table S1.** Fitted pre-exponential factors ( $A$ ) of the Arrhenius equation based on the computational  
 174 results of  $k_{-1}$  and  $k_2$  for each SPC generated from the ozonolysis of  $\alpha$ -cedrene and  $\alpha$ -copaene.

| SPC    | $\alpha$ -cedrene    |                      | $\alpha$ -copaene    |                      |
|--------|----------------------|----------------------|----------------------|----------------------|
|        | $k_{-1}$             | $k_2$                | $k_{-1}$             | $k_2$                |
| SPC1-1 | $1.6 \times 10^{13}$ | $4.2 \times 10^{10}$ | $1.6 \times 10^{13}$ | $9.3 \times 10^9$    |
| SPC1-2 | $1.6 \times 10^{13}$ | $2.1 \times 10^{10}$ | $1.6 \times 10^{13}$ | $7.9 \times 10^9$    |
| SPC2-1 | $1.6 \times 10^{13}$ | $2.1 \times 10^{10}$ | $1.6 \times 10^{13}$ | $5.7 \times 10^{13}$ |
| SPC2-2 | $1.6 \times 10^{13}$ | $1.7 \times 10^{10}$ | $1.6 \times 10^{13}$ | $1.5 \times 10^{13}$ |

175

176 **Table S2.** Branching ratio of the ozonolysis channels of  $\alpha$ -cedrene and  $\alpha$ -copaene corresponding  
 177 to different SPCs across the studied temperatures.

| T (K) | $\alpha$ -cedrene ozonolysis |      |      |      | $\alpha$ -copaene ozonolysis |      |      |      |
|-------|------------------------------|------|------|------|------------------------------|------|------|------|
|       | 1-1                          | 1-2  | 2-1  | 2-2  | 1-1                          | 1-2  | 2-1  | 2-2  |
| 243   | 0.00                         | 0.00 | 0.94 | 0.06 | 0.00                         | 0.00 | 0.66 | 0.34 |
| 248   | 0.00                         | 0.00 | 0.94 | 0.06 | 0.00                         | 0.00 | 0.65 | 0.35 |
| 253   | 0.00                         | 0.00 | 0.93 | 0.07 | 0.00                         | 0.00 | 0.65 | 0.35 |
| 258   | 0.00                         | 0.00 | 0.93 | 0.07 | 0.00                         | 0.00 | 0.64 | 0.36 |
| 263   | 0.00                         | 0.00 | 0.93 | 0.07 | 0.00                         | 0.00 | 0.63 | 0.37 |
| 268   | 0.00                         | 0.00 | 0.93 | 0.07 | 0.00                         | 0.00 | 0.63 | 0.37 |
| 273   | 0.00                         | 0.00 | 0.92 | 0.08 | 0.00                         | 0.00 | 0.62 | 0.38 |
| 278   | 0.00                         | 0.00 | 0.92 | 0.08 | 0.00                         | 0.00 | 0.62 | 0.38 |
| 283   | 0.00                         | 0.00 | 0.92 | 0.08 | 0.00                         | 0.00 | 0.61 | 0.39 |
| 288   | 0.00                         | 0.00 | 0.91 | 0.09 | 0.00                         | 0.00 | 0.60 | 0.40 |
| 293   | 0.00                         | 0.00 | 0.91 | 0.09 | 0.00                         | 0.00 | 0.60 | 0.40 |
| 298   | 0.00                         | 0.00 | 0.91 | 0.09 | 0.00                         | 0.00 | 0.59 | 0.41 |
| 303   | 0.00                         | 0.00 | 0.90 | 0.10 | 0.00                         | 0.00 | 0.59 | 0.41 |
| 308   | 0.00                         | 0.00 | 0.90 | 0.10 | 0.00                         | 0.00 | 0.59 | 0.41 |
| 313   | 0.00                         | 0.00 | 0.90 | 0.10 | 0.00                         | 0.00 | 0.58 | 0.42 |
| 318   | 0.00                         | 0.00 | 0.90 | 0.10 | 0.00                         | 0.00 | 0.58 | 0.42 |
| 323   | 0.00                         | 0.00 | 0.89 | 0.11 | 0.00                         | 0.00 | 0.57 | 0.43 |

178

179 **Table S3.** Relaxation timescale of CI formation from the ozonolysis of  $\alpha$ -farnesene and  $\beta$ -  
 180 farnesene.

| T (K) | $\alpha$ -farnesene (unit: minutes) |     | $\beta$ -farnesene (unit: minutes) |       |
|-------|-------------------------------------|-----|------------------------------------|-------|
|       | CI1                                 | CI2 | CI1                                | CI2   |
| 243   | 0.4                                 | 7.1 | 556.3                              | 483.9 |
| 248   | 0.2                                 | 3.5 | 276.1                              | 210.7 |
| 253   | 0.1                                 | 1.8 | 140.8                              | 94.7  |
| 258   | 0.1                                 | 0.9 | 73.7                               | 43.9  |
| 263   | 0.0                                 | 0.5 | 39.5                               | 20.9  |
| 268   | 0.0                                 | 0.3 | 21.7                               | 10.3  |
| 273   | 0.0                                 | 0.2 | 12.1                               | 5.2   |
| 278   | 0.0                                 | 0.1 | 7.0                                | 2.7   |
| 283   | 0.0                                 | 0.1 | 4.1                                | 1.4   |
| 288   | 0.0                                 | 0.0 | 2.4                                | 0.8   |
| 293   | 0.0                                 | 0.0 | 1.5                                | 0.4   |
| 298   | 0.0                                 | 0.0 | 0.9                                | 0.2   |
| 303   | 0.0                                 | 0.0 | 0.6                                | 0.1   |
| 308   | 0.0                                 | 0.0 | 0.4                                | 0.1   |
| 313   | 0.0                                 | 0.0 | 0.2                                | 0.0   |
| 318   | 0.0                                 | 0.0 | 0.1                                | 0.0   |
| 323   | 0.0                                 | 0.0 | 0.1                                | 0.0   |

181

182 **Table S4.** Comparison of computed POZ decomposition energy barriers between DLPNO-  
183 CCSD(T)/def2-TZVPP and DLPNO-CCSD(T)/cc-pVTZ (unit: kcal mol<sup>-1</sup>).

| Sesquiterpenes         | DLPNO-CCSD(T)/def2-TZVPP |      | DLPNO-CCSD(T)/cc-pVTZ |      |
|------------------------|--------------------------|------|-----------------------|------|
|                        | CI1                      | CI2  | CI1                   | CI2  |
| $\alpha$ -cedrene      | 15.2                     | 18.3 | 15.6                  | 18.7 |
| $\alpha$ -copaene      | 21.4                     | 22.9 | 21.8                  | 23.2 |
| $\beta$ -caryophyllene | 27.6                     | 25.8 | 28.1                  | 26.3 |
| $\alpha$ -farnesene    | 15.6                     | 16.2 | 15.9                  | 16.5 |
| $\beta$ -farnesene     | 16.4                     | 19.2 | 16.9                  | 19.5 |

184

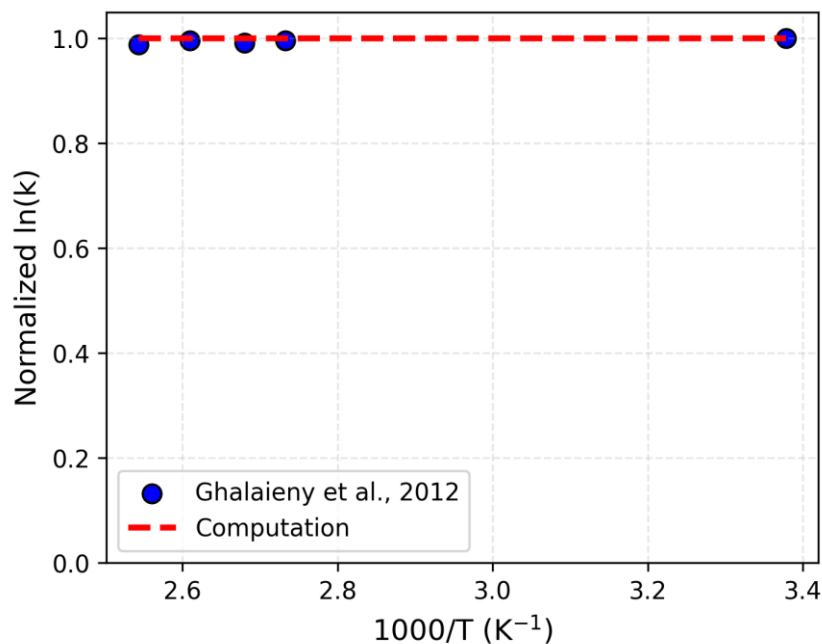

185  
186 **Figure S1.** The experimental and computed ozonolysis rate constant of  $\alpha$ -cedrene at different  
187 temperatures. The experimental data is reproduced with permission (Ghalaieny et al., 2012).  
188 Copyright 2012 Royal Society of Chemistry.  
189

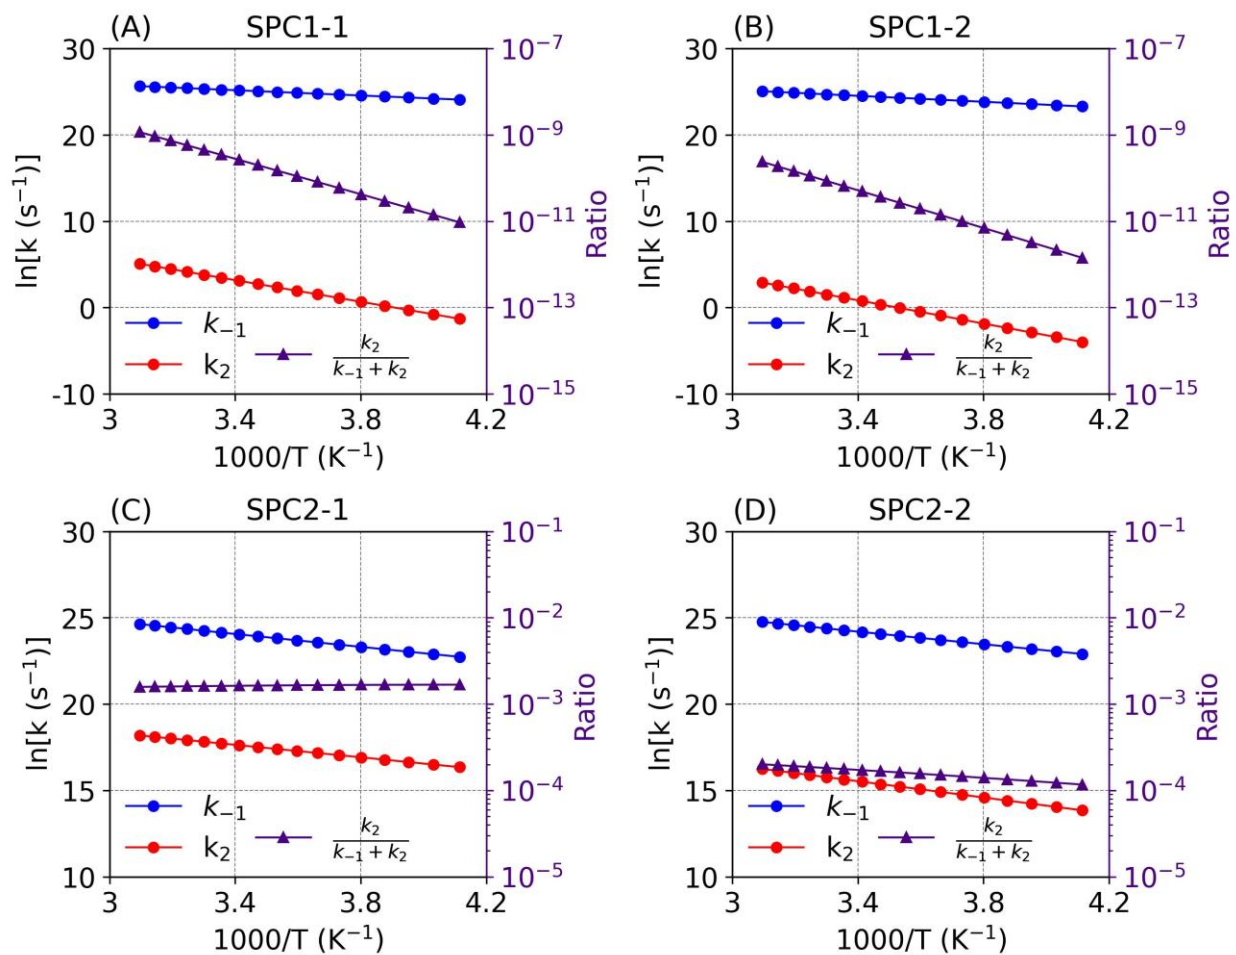

190

191 **Figure S2.** Temperature dependence of  $\ln(k_{-1})$ ,  $\ln(k_2)$  and  $k_2 / (k_{-1} + k_2)$  of  $\alpha$ -cedrene ozonolysis.

192

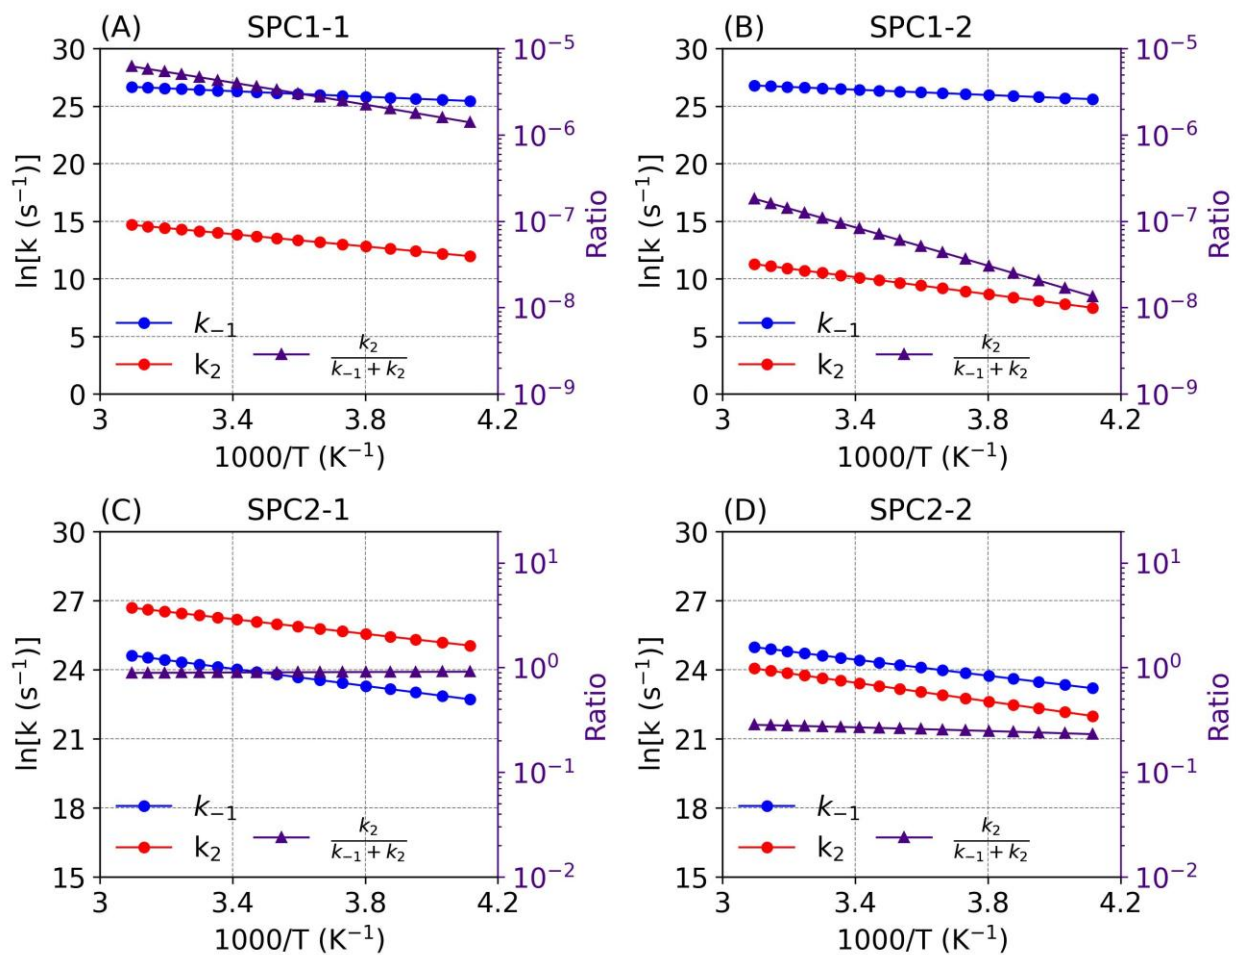

193

194 **Figure S3.** Temperature dependence of  $\ln(k_{-1})$ ,  $\ln(k_2)$  and  $k_2 / (k_{-1} + k_2)$  of  $\alpha$ -copaene ozonolysis.

195

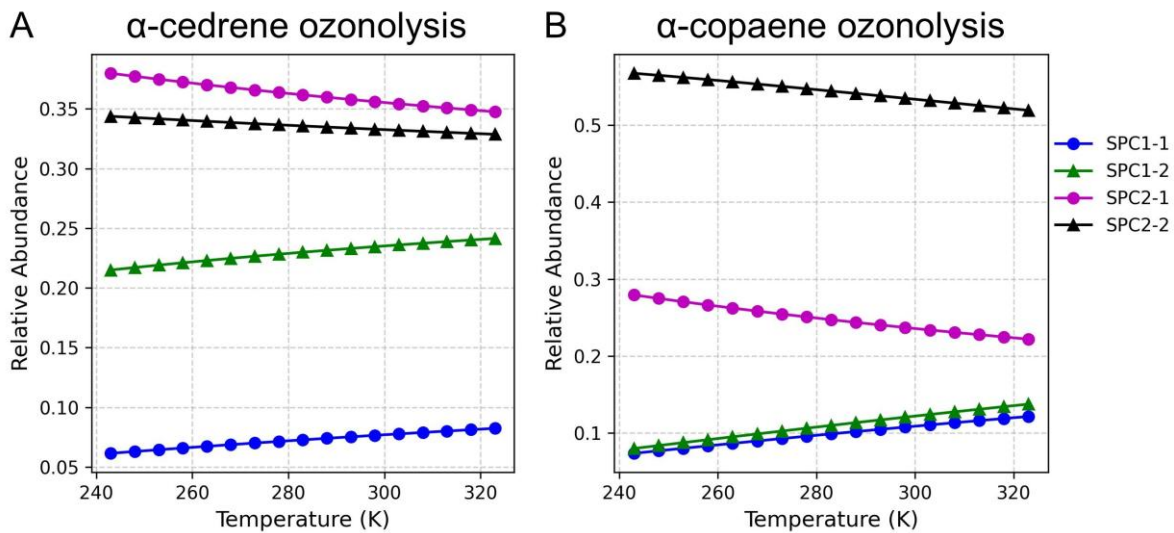

196  
 197 **Figure S4.** The relative abundance of SPCs in the ozonolysis of (A)  $\alpha$ -cedrene and (B)  $\alpha$ -copaene  
 198 across the studied temperatures.  
 199

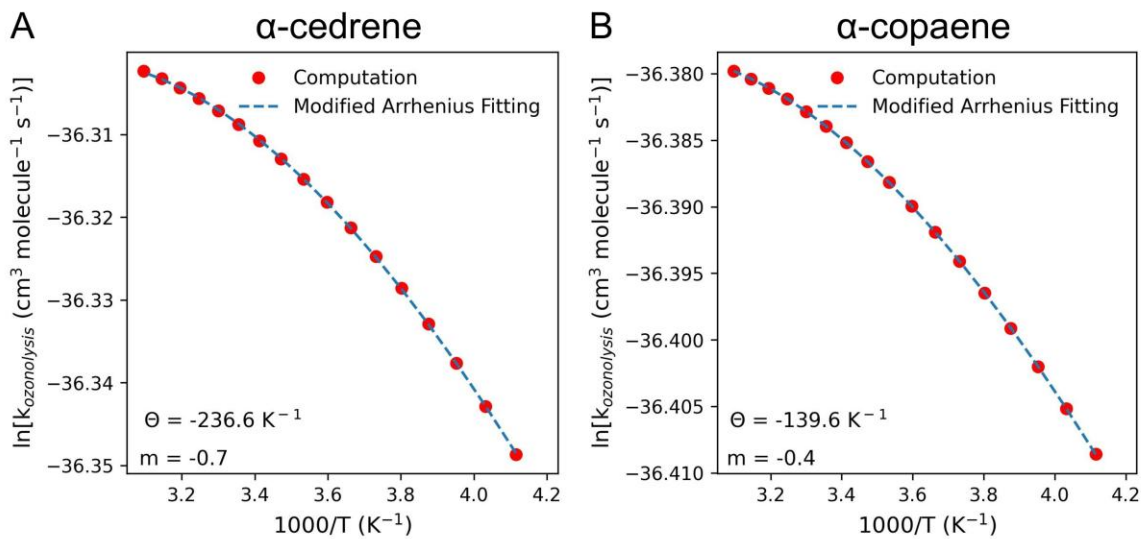

200

201 **Figure S5.** Fitting of the computed temperature-dependent ozonolysis rate constants with the  
 202 modified Arrhenius equation.

203

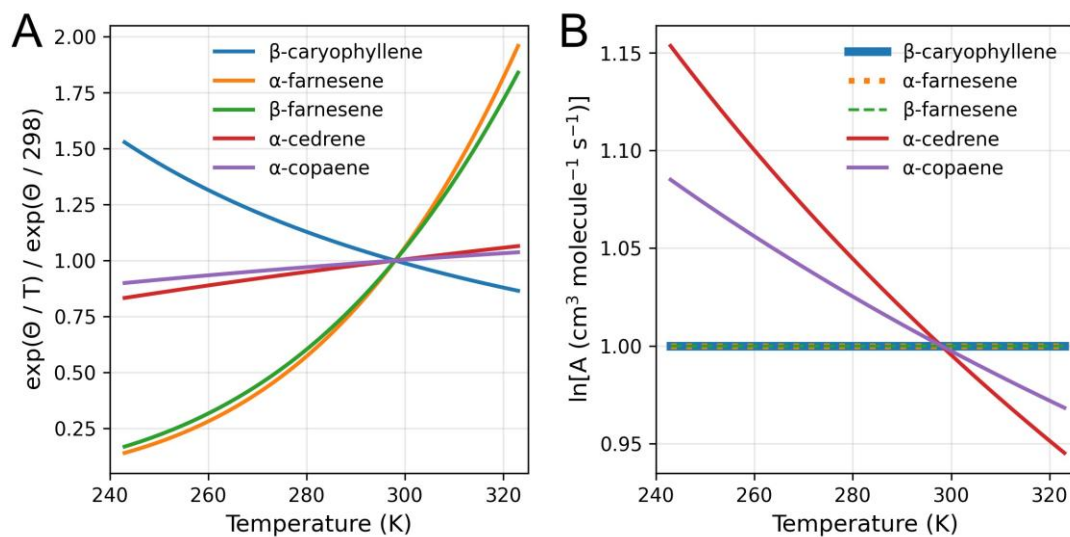

204

205 **Figure S6.** Comparison of Arrhenius equation components among  $\beta$ -caryophyllene (Gao et al.,  
 206 2022),  $\alpha$ -farnesene (Kim et al., 2011),  $\beta$ -farnesene (Kim et al., 2011),  $\alpha$ -cedrene, and  $\alpha$ -copaene:  
 207 (A) relative exponential factor, and (B) pre-exponential factor (natural logarithm).

208

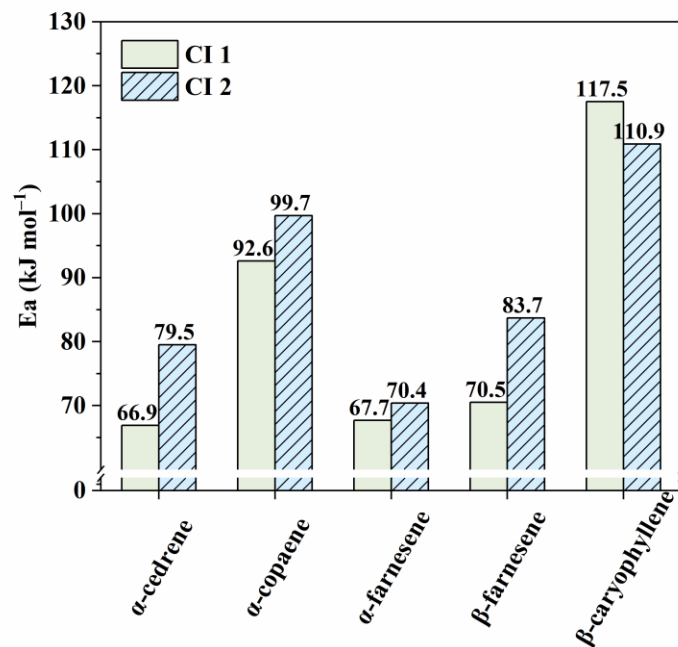

209

210 **Figure S7.** Activation energy of POZ decomposition rate constants ( $k_3$ ) corresponding to CI1 and  
 211 CI2 of all the studied sesquiterpenes.

212

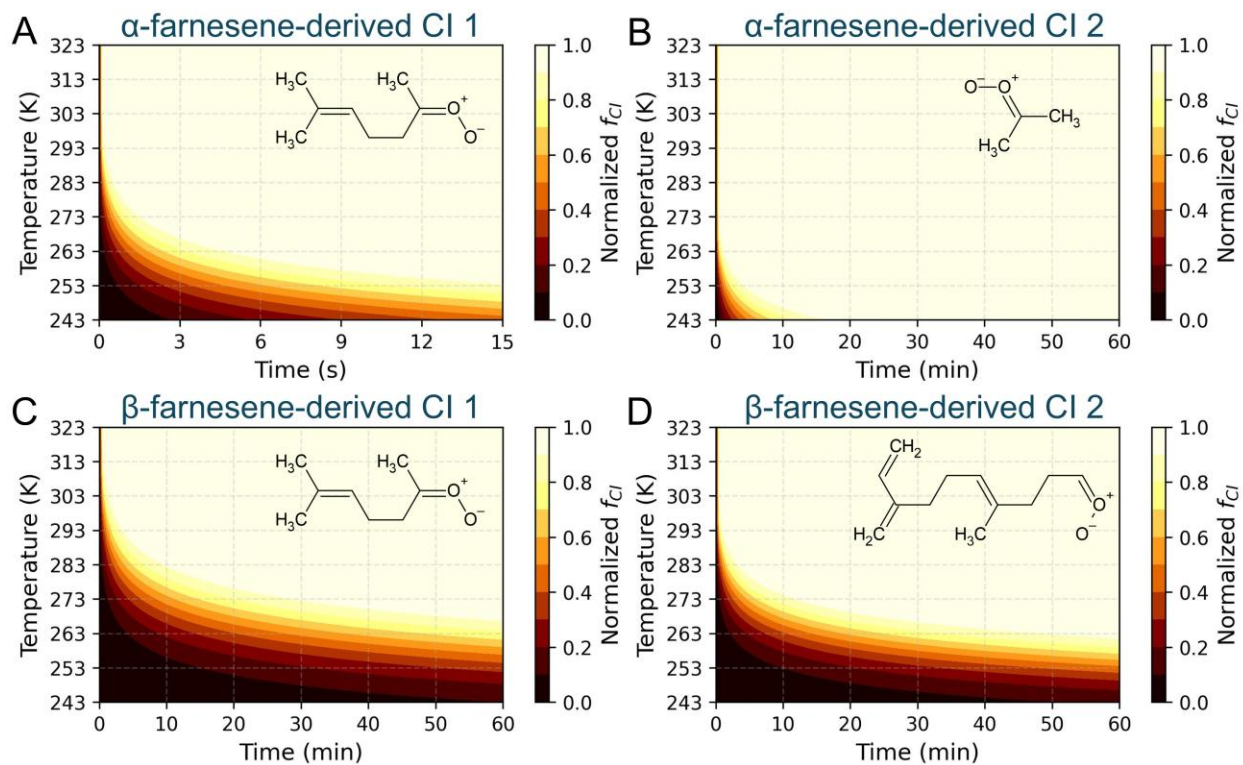

213

214 **Figure S8.** Kinetic relaxation of formation rate constant of (A)  $\alpha$ -farnesene-derived CI1; (B)  $\alpha$ -  
 215 farnesene-derived CI2; (C)  $\beta$ -farnesene-derived CI1; (D)  $\beta$ -farnesene-derived CI2.

216

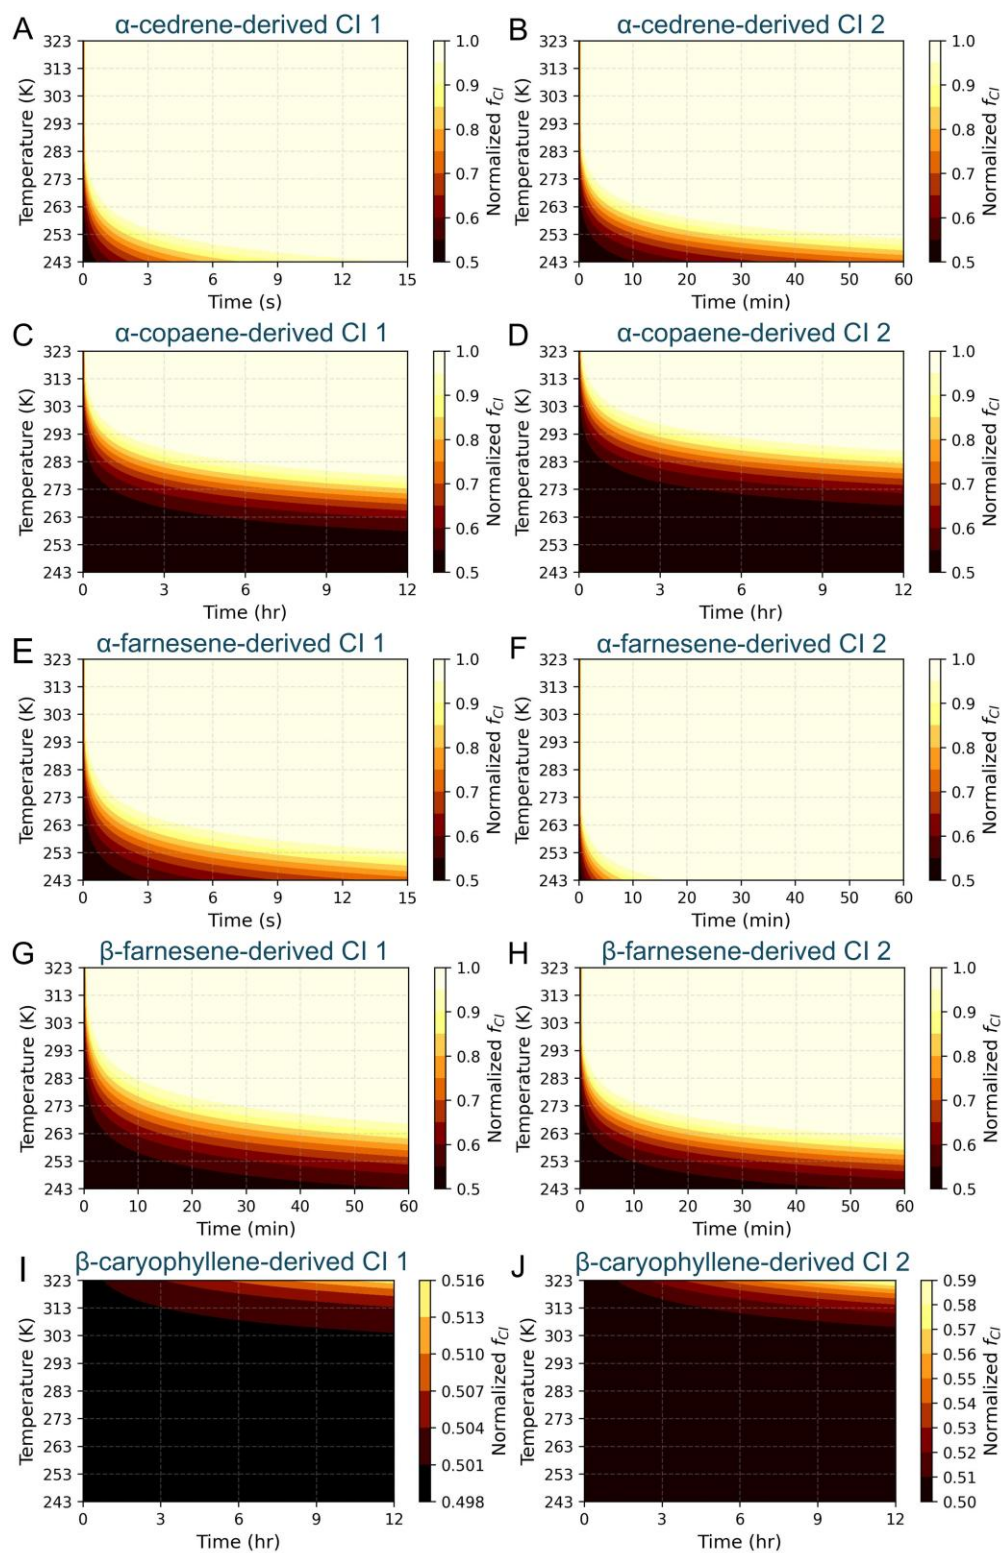

217

218 **Figure S9.** Kinetic relaxation of the modified  $k_{CI}$  with a scale factor of 0.5 for all the studied  
 219 sesquiterpenes.

220

221 **References**

- 222 Davis, M. E., Drake, W., Vimal, D., and Stevens, P. S.: Experimental and theoretical studies of  
223 the kinetics of the reactions of OH and OD with acetone and acetone-d6 at low pressure, J.  
224 Photochem. Photobiol. A Chem., 176, 162-171, <https://doi.org/10.1016/j.jphotochem.2005.08.030>,  
225 2005.
- 226 Donahue, N. M., Drozd, G. T., Epstein, S. A., Presto, A. A., and Kroll, J. H.: Adventures in  
227 ozoneland: down the rabbit-hole, Phys. Chem. Chem. Phys., 13, 10848-10857,  
228 10.1039/C0CP02564J, 2011.
- 229 Gao, L., Song, J., Mohr, C., Huang, W., Vallon, M., Jiang, F., Leisner, T., and Saathoff, H.:  
230 Kinetics, SOA yields, and chemical composition of secondary organic aerosol from  $\beta$ -  
231 caryophyllene ozonolysis with and without nitrogen oxides between 213 and 313 K, Atmos. Chem.  
232 Phys., 22, 6001-6020, 10.5194/acp-22-6001-2022, 2022.
- 233 Ghalaieny, M., Bacak, A., McGillen, M., Martin, D., Knights, A. V., O'Doherty, S., Shallcross, D.  
234 E., and Percival, C. J.: Determination of gas-phase ozonolysis rate coefficients of a number of  
235 sesquiterpenes at elevated temperatures using the relative rate method, Phys. Chem. Chem. Phys.,  
236 14, 6596-6602, 10.1039/C2CP23988D, 2012.
- 237 Kim, D., Stevens, P. S., and Hites, R. A.: Rate Constants for the Gas-Phase Reactions of OH and  
238 O<sub>3</sub> with  $\beta$ -Ocimene,  $\beta$ -Myrcene, and  $\alpha$ - and  $\beta$ -Farnesene as a Function of Temperature, J. Phys.  
239 Chem. A, 115, 500-506, 10.1021/jp111173s, 2011.
- 240 Ou, H. and Chen, K.: Atmospheric Temperature Dependence of  $\beta$ -Caryophyllene Ozonolysis  
241 Kinetics Is Governed by Stabilized Prereactive Complexes, J. Phys. Chem. A, 129, 9982-9990,  
242 10.1021/acs.jpca.5c05523, 2025.
- 243 Taatjes, C. A., Shallcross, D. E., and Percival, C. J.: Research frontiers in the chemistry of Criegee  
244 intermediates and tropospheric ozonolysis, Phys. Chem. Chem. Phys., 16, 1704-1718,  
245 10.1039/C3CP52842A, 2014.
- 246 Talukdar, R. K., Gierczak, T., McCabe, D. C., and Ravishankara, A. R.: Reaction of Hydroxyl  
247 Radical with Acetone. 2. Products and Reaction Mechanism, J. Phys. Chem. A, 107, 5021-5032,  
248 10.1021/jp0273023, 2003.
- 249 Vereecken, L. and Francisco, J. S.: Theoretical studies of atmospheric reaction mechanisms in the  
250 troposphere, Chem. Soc. Rev., 41, 6259-6293, 10.1039/C2CS35070J, 2012.

251
